# Supplementary material for: An Integrative Explainable Artificial Intelligence Approach to Analyze Fine-Scale Land-Cover and Land-Use Factors Associated with Spatial Distributions of Place of Residence of Reported Dengue Cases
Source: MDPI journal article supplement (doi:10.3390/tropicalmed8040238), 2023-04-20
Supplement: s1 [file s1]

# Supplementary Materials: An Integrative Explainable Artificial Intelligence Approach to Analyze Fine-Scale Land-Cover and Land-Use Factors Associated with Spatial Distributions of Place of Residence of Reported Dengue Cases

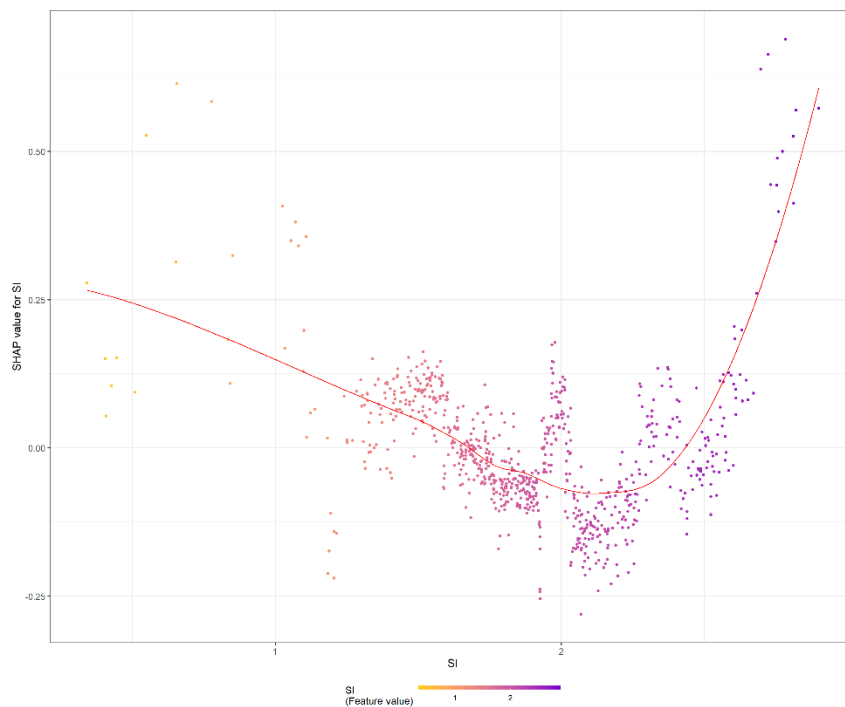

**Figure S1.** Shapley Additive Explanation (SHAP) dependence plots of SI.

**Table S1.** Classifications of third-level land-cover land-use types in Kaohsiung City, Taiwan.

| No.     | Description                               |
|---------|-------------------------------------------|
| F010101 | Rice                                      |
| F010102 | Dry crops                                 |
| F010103 | Fruit tree                                |
| F010104 | Abandoned field                           |
| F010200 | Aquaculture                               |
| F010301 | Livestock house                           |
| F010302 | Pasture                                   |
| F010401 | Greenhouse                                |
| F010402 | Agriculture Storage facility              |
| F010403 | Agricultural product exhibition and sales |
| F010404 | Others                                    |
| F020101 | Natural needle leaf forest                |
| F020102 | Natural broad leaf forest                 |
| F020103 | Natural bamboo forest                     |
| F020104 | Natural mixed forest                      |
| F020201 | Artificial needle leaf forest             |
| F020202 | Artificial broad leaf forest              |
| F020203 | Artificial bamboo forest                  |

---

|         |                                   |
|---------|-----------------------------------|
| F020204 | Artificial mixed forest           |
| F020301 | Logging site                      |
| F020302 | Tree Nursery                      |
| F020303 | Firebreak                         |
| F030100 | Airport                           |
| F030201 | General railway                   |
| F030202 | High speed railway                |
| F030203 | Railway related facilities        |
| F030301 | Highway                           |
| F030302 | Expressway                        |
| F030303 | General road                      |
| F030304 | Road-related facilities           |
| F030401 | Commercial port                   |
| F030402 | Fishing port                      |
| F030403 | Exclusive port                    |
| F030404 | Other port related facilities     |
| F040101 | River                             |
| F040103 | Canal                             |
| F040104 | Embankment                        |
| F040200 | Ditch                             |
| F040301 | Reservoir                         |
| F040302 | Lake                              |
| F040303 | Others                            |
| F040304 | Artificial lake                   |
| F040400 | Estuary                           |
| F040501 | Sluice gate                       |
| F040502 | Pumping station                   |
| F040503 | Reservoir dam                     |
| F040504 | Underground water well            |
| F040505 | Other facilities                  |
| F040600 | Flood control road                |
| F050101 | Retail and wholesale              |
| F050102 | Industry service                  |
| F050201 | Residential area                  |
| F050202 | Industrial area                   |
| F050203 | Commercial area                   |
| F050204 | Mixture areas                     |
| F050301 | Manufacturing                     |
| F050302 | Warehousing                       |
| F050401 | Religion                          |
| F050402 | Funeral facilities                |
| F050403 | Under construction                |
| F050404 | Others                            |
| F060100 | Government agencies               |
| F060201 | Kindergarten                      |
| F060202 | Primary school                    |
| F060203 | High school                       |
| F060204 | University                        |
| F060205 | Special school                    |
| F060300 | Health Facilities                 |
| F060400 | Social welfare facility           |
| F060501 | Meteorological stations           |
| F060502 | Electric power facilities         |
| F060503 | Liquefied natural gas terminal    |
| F060504 | Water works                       |
| F060505 | Gas stations                      |
| F060600 | Environmental protection facility |
| F070101 | Official cultural assets          |

---

|         |                                 |
|---------|---------------------------------|
| F070102 | General cultural facilities     |
| F070103 | Other cultural facilities       |
| F070201 | Park / Green area               |
| F070202 | Amusement area                  |
| F080101 | Mine field                      |
| F080102 | Mining related facilities       |
| F080201 | Stone quarry                    |
| F080202 | Stone quarry related facilities |
| F090100 | Military land                   |
| F090200 | Wetlands                        |
| F090300 | Grassland                       |
| F090401 | Beach                           |
| F090402 | Collapse                        |
| F090403 | Reef rock                       |
| F090404 | Bare open space                 |
| F090500 | Shrub wasteland                 |
| F090600 | Disaster place                  |
| F090700 | Remaining quarry place          |
| F090801 | Unused land                     |
| F090802 | Artificially changing land      |

Source: Taiwan's National Land Surveying and Mapping Center, the Ministry of the Interior ([www.nlsc.gov.tw](http://www.nlsc.gov.tw)).

**Table S2.** Sources of dependent and independent variables in the analysis.

| Variables                            | Types                 | Sources                                                                           |
|--------------------------------------|-----------------------|-----------------------------------------------------------------------------------|
| Dengue Confirmed Cases               | Dependent Variable    | Taiwan Centres for Disease Control                                                |
| Level-3 Land Use and Land Cover Data | Independent Variables | Taiwan's National Land Surveying and Mapping Center, the Ministry of the Interior |
| Household Density                    |                       | National Statistics, Taiwan                                                       |
| Climate Parameters                   |                       | Central Weather Bureau, Taiwan                                                    |

Sources: Taiwan's National Land Surveying and Mapping Center, the Ministry of the Interior ([www.nlsc.gov.tw](http://www.nlsc.gov.tw)); National Statistics, Taiwan ([www.stat.gov.tw](http://www.stat.gov.tw)); Central Weather Bureau, Taiwan ([www.cwb.gov.tw](http://www.cwb.gov.tw)).

**Table S3.** Hyperparameter tuning details for XGBoost modelling.

| Parameters                                                                | Hyperparameter tuning value range | Optimal value |
|---------------------------------------------------------------------------|-----------------------------------|---------------|
| Number of decision trees (nrounds)                                        | 50–1000                           | 150           |
| Maximum depth of a tree (max_depth)                                       | 1–10                              | 8             |
| Subsample ratio of columns when constructing each tree (colsample_bytree) | 0.5–1                             | 0.7778        |
| Learning rate (eta)                                                       | 0.1–1                             | 0.3           |
| Minimum loss reduction (gamma)                                            | 0–10                              | 0             |
| Subsample ratio of the training instances (subsample)                     | 0.1–1                             | 0.6           |
